# Supplementary material
Source: publisher figshare collection journal article supplement (https://rs.figshare.com/ndownloader/files/13439789)
Supplement: Supplementary file 1 [file 13439789]

### Supplementary material for:

M.A.J. van Kelle, P.J.A. Oomen, W.J.T. Janssen-van den Broek, R.G.P. Lopata, S. Loerakker, C.V.C. Bouten

Initial scaffold thickness affects the emergence of a geometrical and mechanical equilibrium in engineered cardiovascular tissues

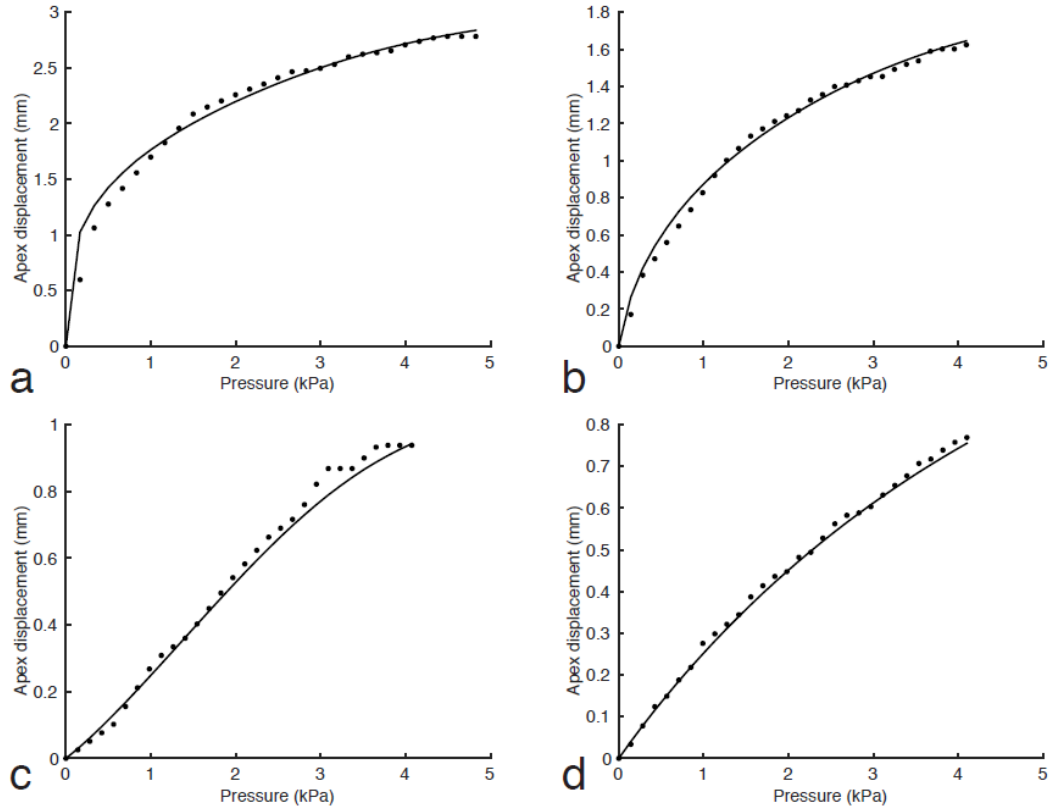

**Figure 1:** Relationship between apex displacement and applied pressure of one thin (a,c) and one thick (b,d) sample at two different time points, day 0 (a,b) and day 21 (c,d). The inverse analysis uses the central 50% of the construct for estimating the material properties (Section 2.5.1). Here the experimental (markers) and estimated (continuous lines) displacement of only the apex is shown as a function of the applied pressure.
